# Supplementary material
Source: MDPI journal article supplement (https://www.mdpi.com/2227-9040/11/5/308)
Supplement: s1 [file s1]

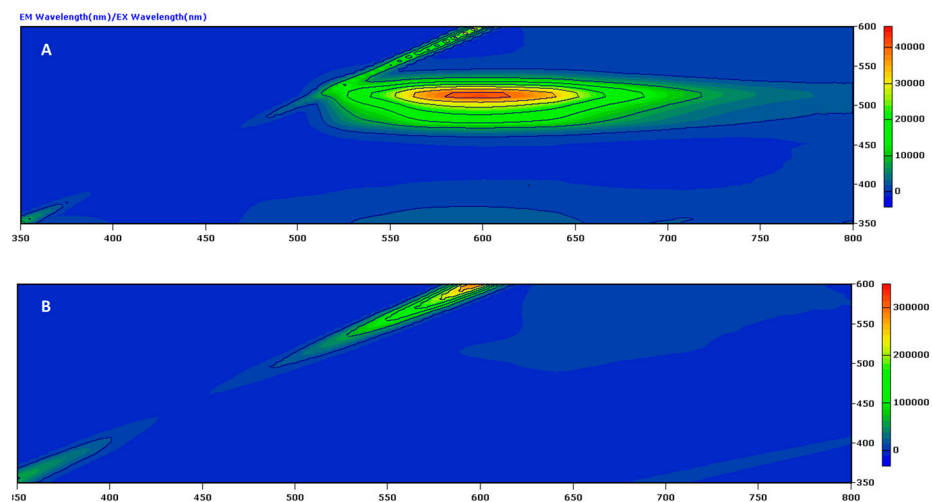

**Figure S1.** 2D full range excitation and emission profiles for A) Sensor A solution alone and B) Sensor A solution in the presence of 100 ppm  $\text{Hg}^{2+}$  solution at pH 5.

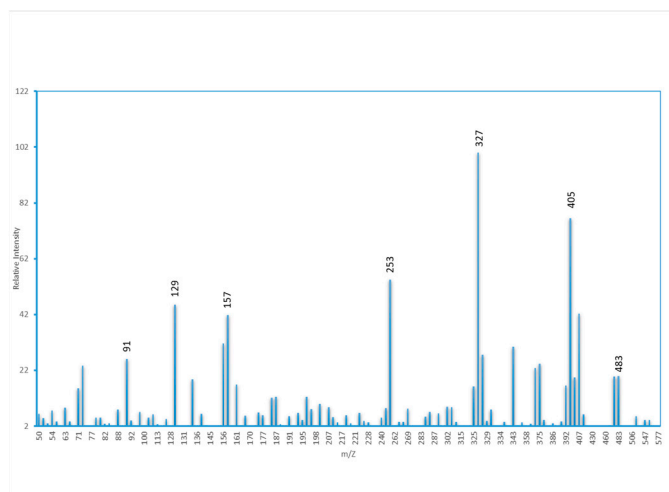

**Figure S2.** EI-Mass spectrum for Sensor A

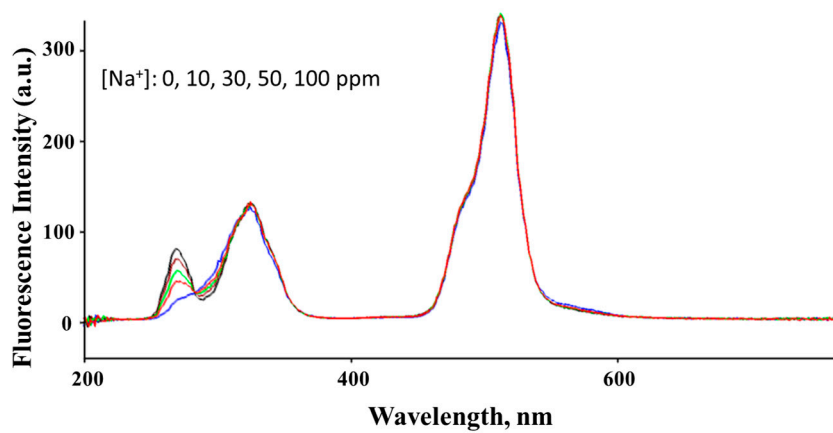

**Figure S3:** SLS of Sensor A before and after adding various concentrations of sodium ion.

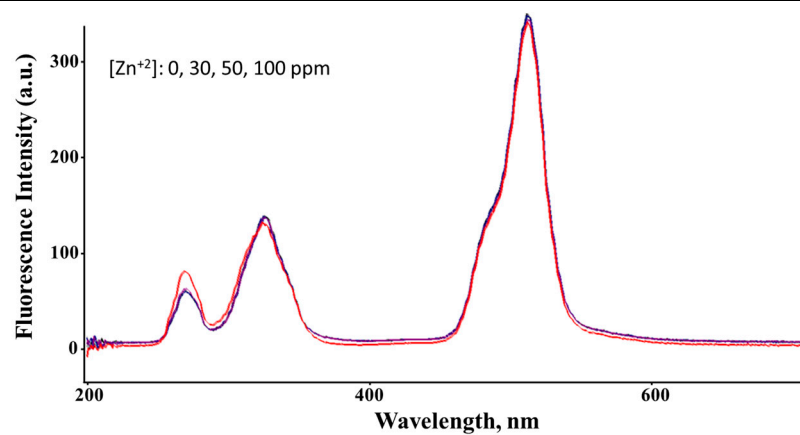

Figure S4: SSLS of Sensor A before and after adding various concentrations of Zinc ion.

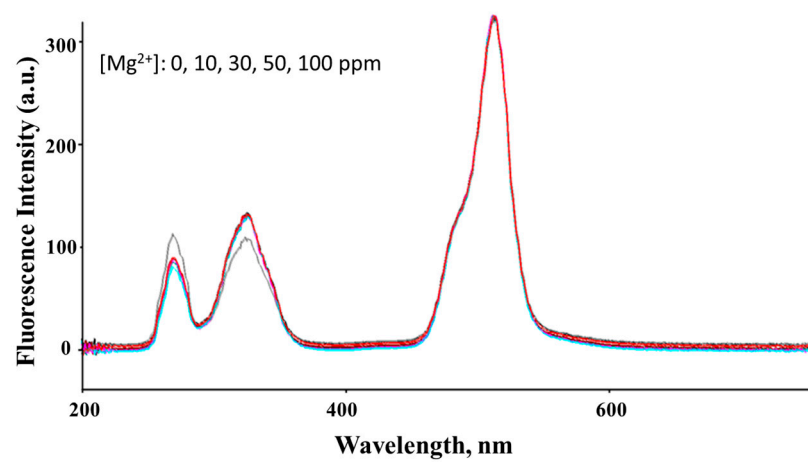

Figure S5: SSLS of Sensor A before and after adding various concentrations of Magnesium ion.

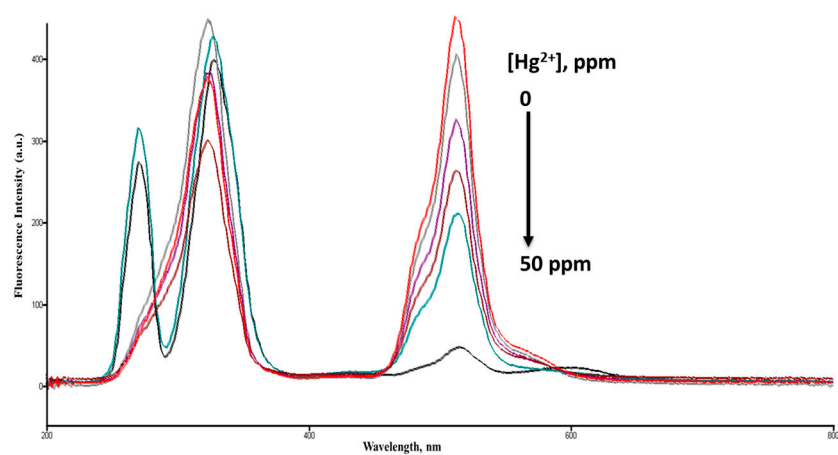

**Figure S6.** Synchronous Scan Luminescence Spectra of **Sensor A** before and after adding various concentrations of mercury ions recorded at  $\Delta\lambda$  of 50 nm and at pH = 7.

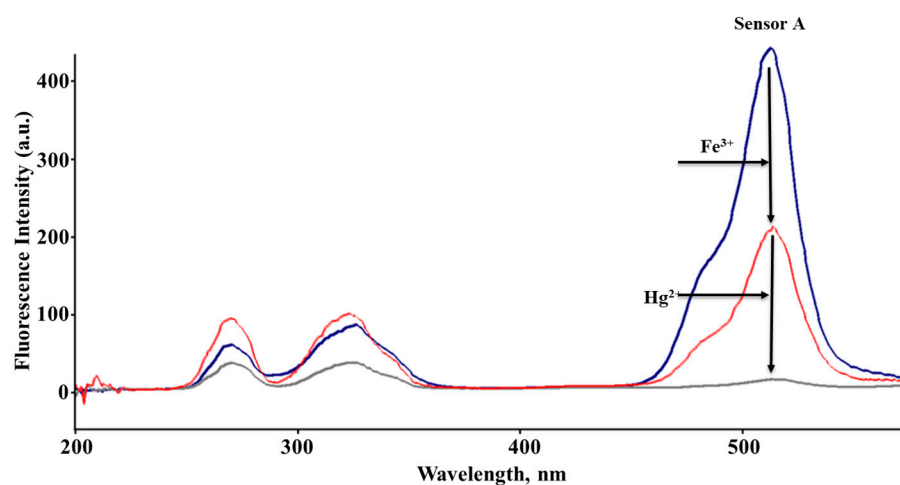

**Figure S7:** SSLS of Sensor A before and after sequential addition of 50 ppm ferric ion and mercuric ion solutions spiked into tap water samples at pH 7.
